# Supplementary material for: Synthesis of photo-switchable 3-FcAB-modified polymer particles
Source: Royal Society of Chemistry journal article supplement (doi:10.1039/c1nj20189a), 2011-01-01
Supplement: c1nj20189a.pdf [file c1nj20189a.pdf]

Supplementary Information

**Synthesis of photo-switchable 3-FcAB-modified polymer particles**

Kosuke Namiki, Masaki Murata, Shoko Kume, and Hiroshi Nishihara  
Department of Chemistry, School of Science, The University of Tokyo

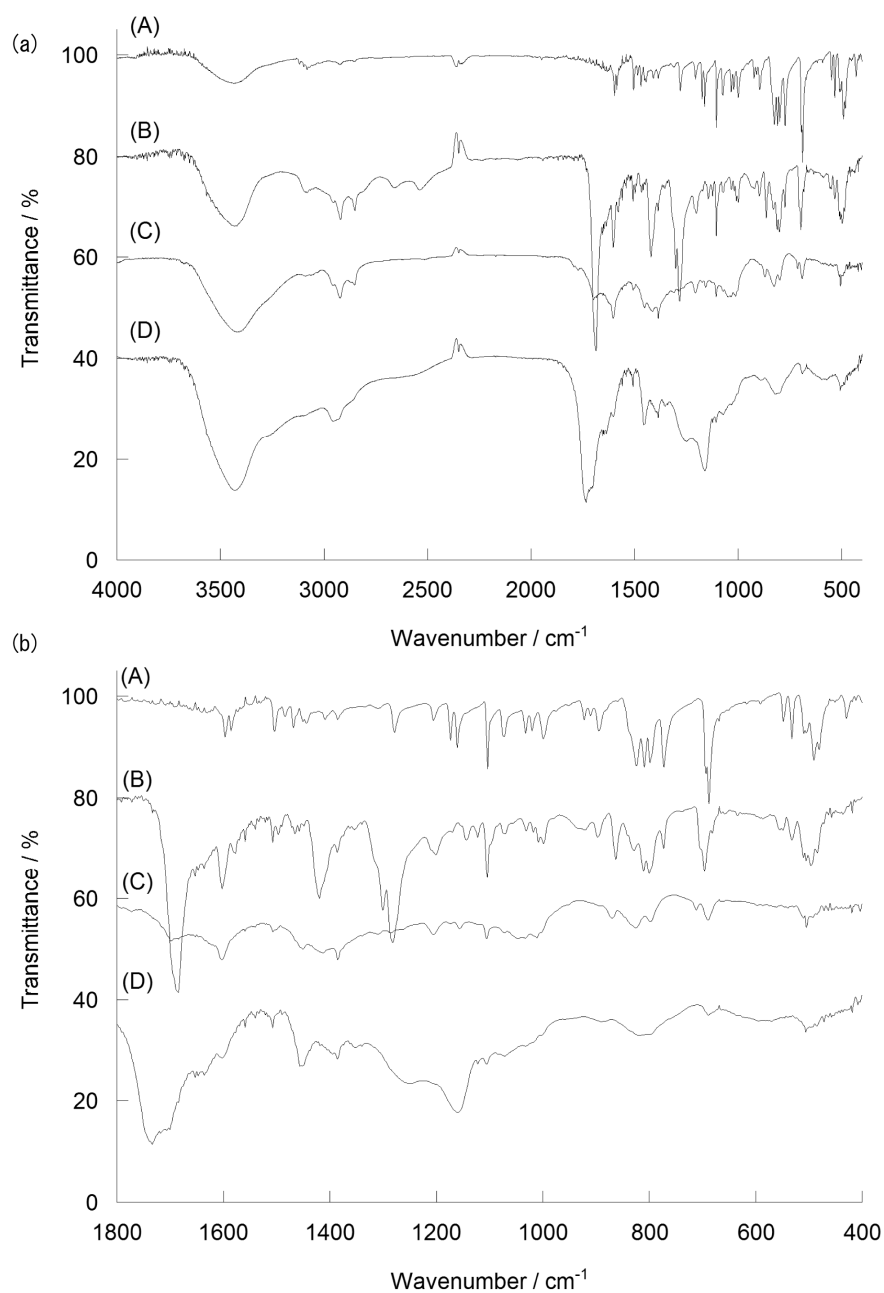

**Fig. S1** IR spectra of **3-FcAB** (A), **Monomer** (B), **Polymer A** (C), and **Polymer B** (D) (a), and their enlarged spectra (b).

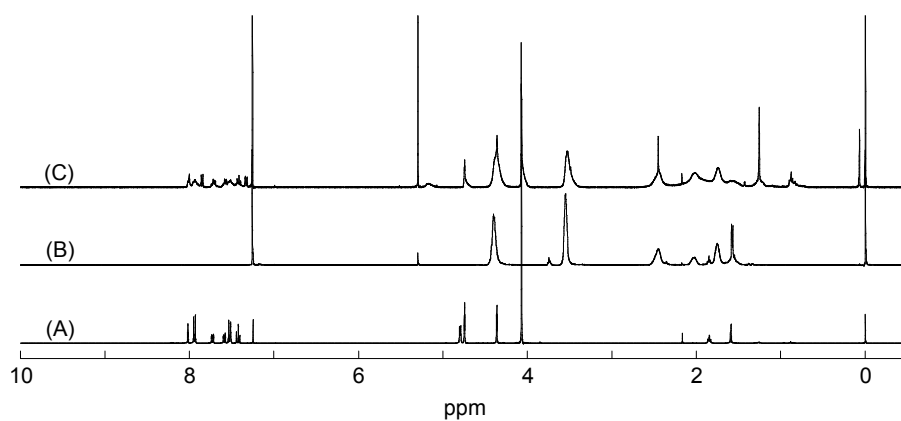

**Fig. S2**  $^1\text{H}$  NMR spectra of 3-ferrocenyl-4'-hydroxymethylazobenzene (A), poly(2-bromo acrylate) (B), and **Polymer A** (C) in  $\text{CDCl}_3$ .

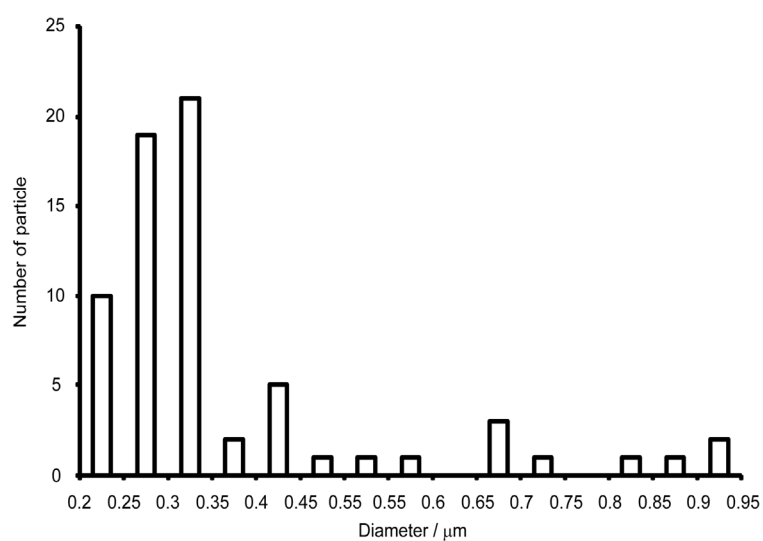

**Fig. S3** The particle size distribution of a SEM image of the re-precipitated **Polymer A** on Au/mica shown in Fig. 1.
